# Supplementary material for: Antimicrobial Combined Action of Graphene Oxide and Light Emitting Diodes for Chronic Wound Management
Source: MDPI journal article supplement (doi:10.3390/ijms23136942), 2022-06-22
Supplement: s1 [file s1]

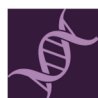

## Supplementary Material

**Table S1.** *Staphylococcus aureus* PECHA 10 and *Pseudomonas aeruginosa* PECHA 4 characterization for their capability to form biofilm and their main virulence factors.

| Strains                      | Biofilm Producer<br>* | Gene Detection         | Hemolytic Action |
|------------------------------|-----------------------|------------------------|------------------|
| <i>S. aureus</i> PECHA 10    | +++                   | <i>agr1; icaA/icaD</i> | -                |
| <i>P. aeruginosa</i> PECHA 4 | +++                   | <i>lasB</i>            | ND               |

ND= not detected.

\* according to Stepanovic et al. [37].

## Reference

37 Stepanović, S.; Vuković, D.; Dakić, I.; Savić, B.; Švabić-Vlahović, M. A Modified Microtiter-Plate Test for Quantification of Staphylococcal Biofilm Formation. *J. Microbiol. Methods* **2000**, *40* (2), 175–179. [https://doi.org/10.1016/s0167-7012\(00\)00122-6](https://doi.org/10.1016/s0167-7012(00)00122-6).
